# Supplementary material
Source: PubMed Central journal article supplement (PMC3887452)
Supplement: Supp_Fig2.pdf [file Supp_Fig2.pdf]

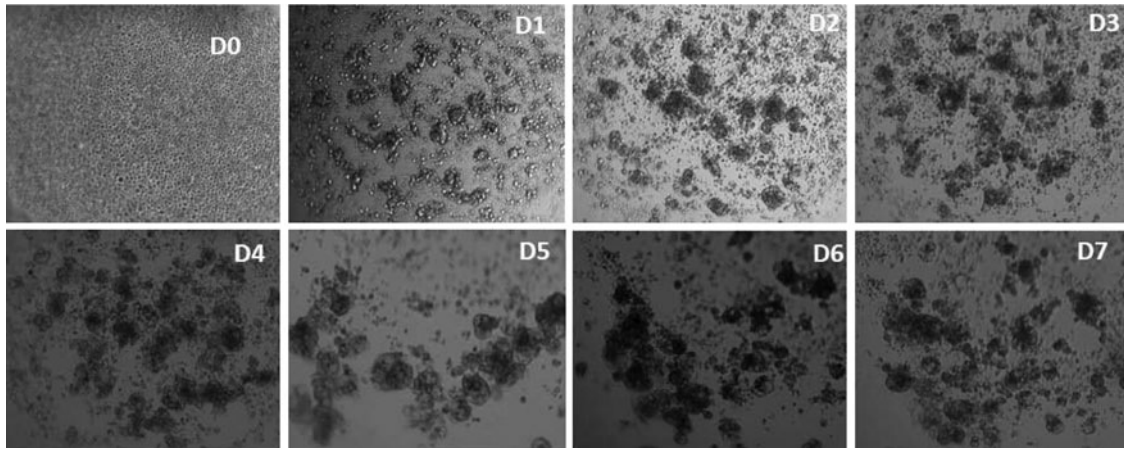

**SUPPLEMENTARY FIG. S2.** Formation of spheroids over 7 days (10×). The smaller aggregates eventually clump to form bigger aggregates.
