# Supplementary material
Source: PubMed Central journal article supplement (PMC3887452)
Supplement: Supp_Fig3.pdf [file Supp_Fig3.pdf]

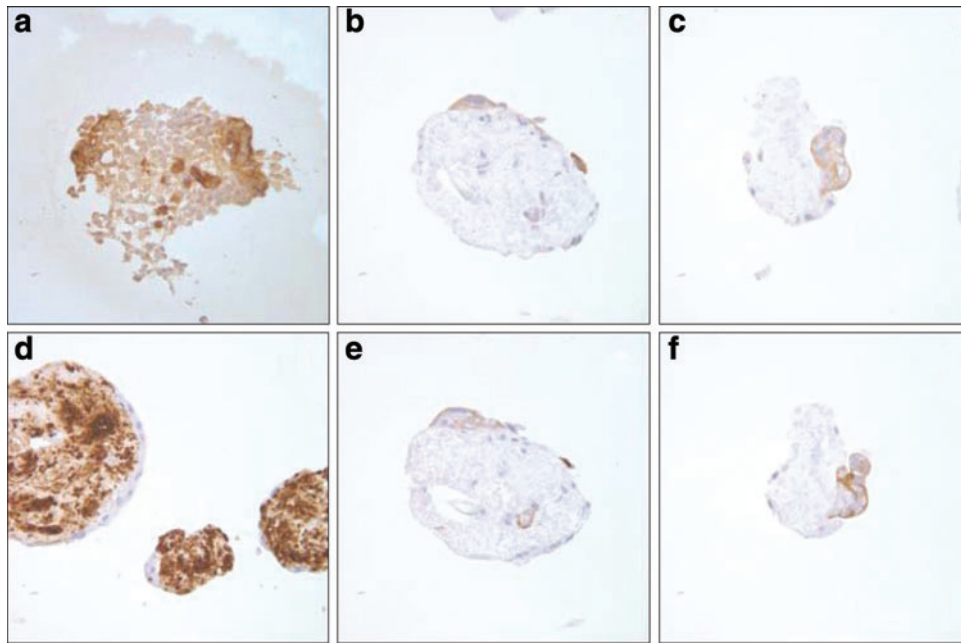

**SUPPLEMENTARY FIG. S3.** Immunohistochemistry of D32 spheroids. Staining for albumin (a), CK8 (b, c), Afp (d), CK18 (e, f) at a magnification of 40× are shown.
