# Supplementary material
Source: PubMed Central journal article supplement (PMC3887452)
Supplement: Supp_Fig4.pdf [file Supp_Fig4.pdf]

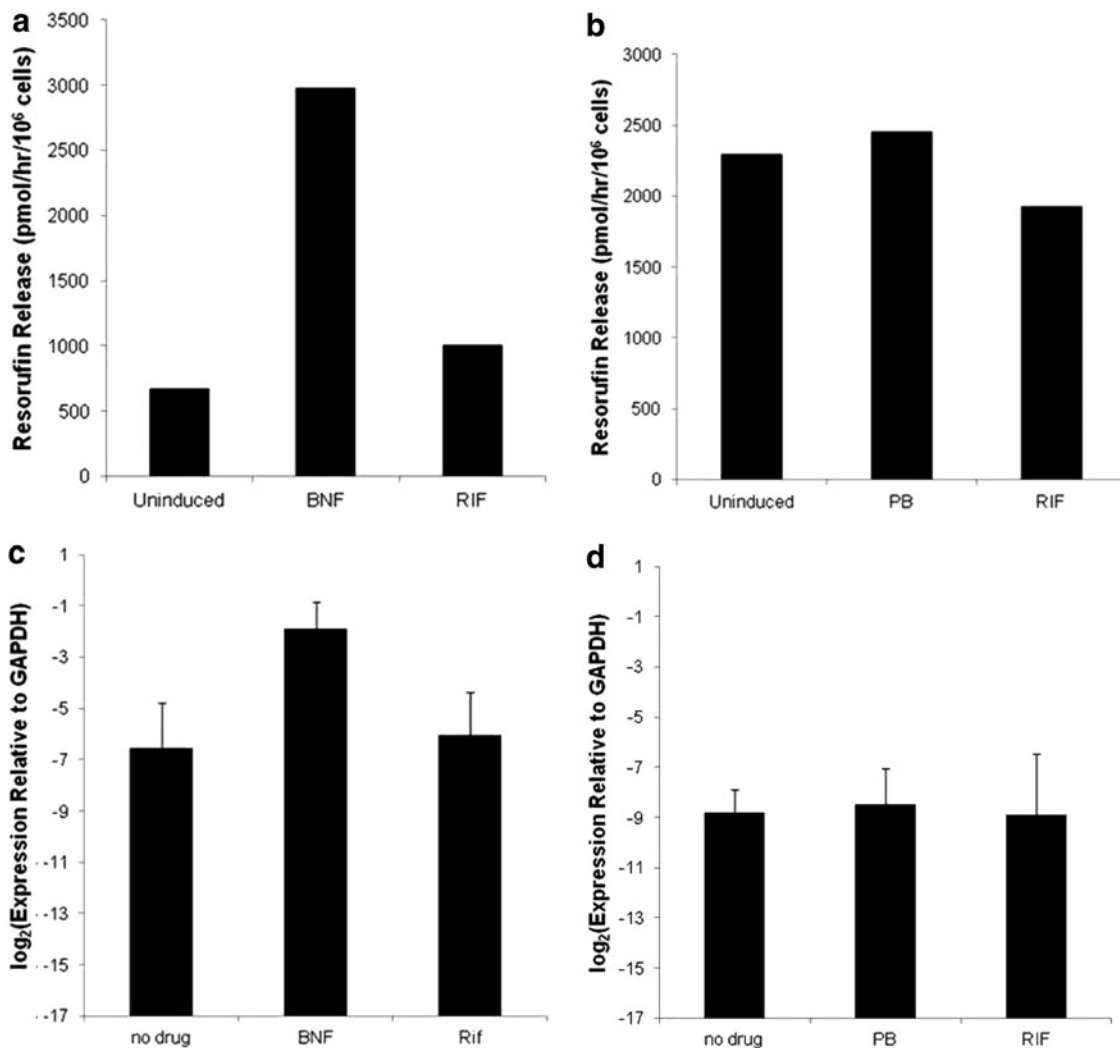

**SUPPLEMENTARY FIG. S4.** Cytochrome P450 activity and expression in spheroids (**a**, **b**). Release of resorufin into culture medium through ethoxyresorufin-O-dealkylation (EROD) reaction (**a**) and pentoxyresorufin-O-dealkylation (PROD) reaction (**b**). D32 spheroids were used and cells were either induced with BNF or Rifampicin (for EROD) or with PB or Rifampicin (for PROD) for 24h. (**c**, **d**) Transcript level of Cyp1A1 (**a**) and Cyp2B6/7 (**b**) with no drug treatment or after treatment with BNF or Rifampicin (Cyp1A1) or with PB or Rifampicin (Cyp2B6/7).
