# Supplementary material
Source: PubMed Central journal article supplement (PMC3887452)
Supplement: Supp_Fig5.pdf [file Supp_Fig5.pdf]

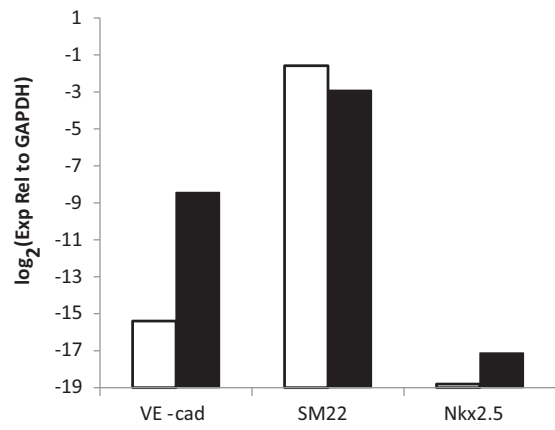

**SUPPLEMENTARY FIG. S5.** Transcript expression levels of nonliver and nonendodermal markers in undifferentiated hES (D0; □) and on D20 of monolayer differentiation (D20; ■).
