# Supplementary material
Source: PubMed Central journal article supplement (PMC3887452)

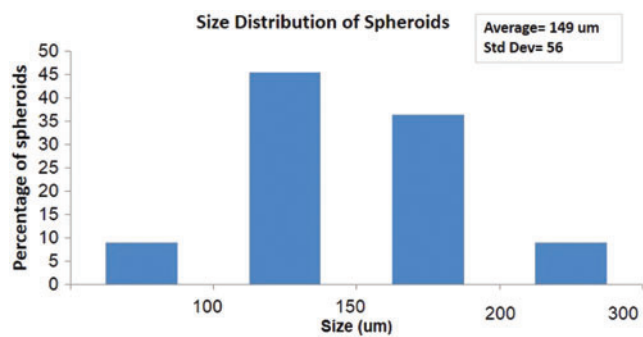

SUPPLEMENTARY FIG. S1. Size distribution of spheroids.

Supplement: Supp_Fig1.pdf [file Supp_Fig1.pdf]
